# Supplementary material
Source: PubMed Central journal article supplement (PMC6611455)
Supplement: supplement_information_cc_finalrevision_bhy186.pdf [file supplement_information_cc_finalrevision_bhy186.pdf]

## Supplementary Material

### Methods

#### Clustering analysis

We applied  $k$ -means clustering to the electrodes in the 2D space of MNI  $y$ -coordinate and peak classification time for facial expressions, with different values of  $k$ , and evaluated the model performance by computing the Bayes information criterion (BIC) and the mean Silhouette coefficient (SC) across all points.

Following (Kass RE and L Wasserman 1995; Pelleg D and AW Moore 2000), the BIC was estimated using Schwartz criterion. Specifically,  $BIC = l(D|\hat{\theta}) - \frac{p}{2} \log N$ , where  $l(D|\hat{\theta})$  is the log-likelihood of the data under the assumption of  $k$ -means (spherical Gaussian) taken at the maximum likelihood estimation of parameters  $\hat{\theta}$ ,  $p$  is the total number of parameters in the model, and  $N$  is the total number of data points.

Following (Kaufman L and PJ Rousseeuw 2009), the Silhouette value for the  $i$ -th point was computed as  $S_i = (b_i - a_i) / \max(a_i, b_i)$ , where  $a_i$  is the average within cluster distance for the  $i$ -th point, and  $b_i$  is the minimum average between cluster distance for the  $i$ -th point (minimized over all other clusters). The mean SC was then estimated by averaging the Silhouette value over all data points.

#### Meta-analysis

Activation likelihood estimation (ALE, (Laird AR et al. 2005; Eickhoff SB et al. 2012)) was used for the meta-analysis of the neuroimaging literature. We first searched the online database of neuroimaging studies on Neurosynth.org and found around 300 imaging studies with the keyword “facial expressions”. We then further narrowed the list

down to 64 fMRI by only including the studies that had a direct full brain mapping by contrasting between emotional facial expressions, e.g. fear vs neutral, happy vs sad, etc. We only took into account the reported activation foci for the contrast between facial expressions. Then all of the activation foci in those relevant full brain map results were collected and extracted as 3D coordinates in MNI space. In the ALE, each of the extracted foci was assigned as the center of a Gaussian distribution, whose variance was scaled by the number of subjects in the corresponding experiment. These Gaussian distributions were then combined to build a full brain map of ALE. The ALE map was corrected for multiple comparison using cluster-based permutation test. Then we performed a spatial permutation test with 1000 permutations to construct a null distribution of the full brain activation. The ALE and the corresponding statistical analysis were performed based on GingerALE 2.3.6 (Eickhoff SB et al. 2009; Turkeltaub PE et al. 2012).

## **Results**

### **Comparison of the contributions from ERP and ERBB features to the classification**

Here we compared the classification results using both ERP and ERBB vs using ERP or ERBB alone. As shown in Figure S1, both ERP and ERBB contributed to the expression decoding (left panel has higher  $d'$  than the other two panels). The posterior  $d'$  peak improves from 0.19 with only ERP features to .23 combining both ERP and ERBB features. The mid-fusiform  $d'$  peak improves from 0.19 with only ERP features to .21 combining both ERP and ERBB features. ERP features made greater contribution to the expression discrimination than ERBB (the middle panel has larger  $d'$  than the right panel,

and the results in the middle panel are very close to results in the left panel). Due to the  $1/f$  decay in the power spectrum, the ERP signal is dominated by low frequency components (mainly alpha and beta bands). This suggests that it is the low frequency components in ERP that mainly contributes to the facial expressions representation in the fusiform (Furl N et al. 2017).

### **Selection of models for $k$ -means clustering**

We applied  $k$ -means clustering to the electrodes in the 2D space of MNI  $y$ -coordinate and peak classification time for facial expressions, with different values of  $k$ , and evaluate the model performance by computing the Bayes information criterion (BIC) and the mean Silhouette coefficient (SC) across all points.

As shown in Figure S4, for  $k = 1$ , BIC = -61.28; for  $k = 2$ , BIC = -54.63. Therefore, Bayes factor between the hypothesis (H1) that there is a cluster structure ( $k = 2$ ) and the null hypothesis (H0) that there is no cluster structure ( $k = 1$ ) can be approximated as  $BF \approx \exp(\frac{BIC_1 - BIC_0}{2})$ . This approximation yields a  $BF > 20$ , which suggests a strong evidence of H1 over H0. In other words, there is a strong clustering structure in the data.

Moreover, for  $k = 2$ , BIC = -54.63, the mean SC = 0.601; for  $k = 3$ , BIC = -56.29, the mean SC = 0.490; for  $k = 4$ , BIC = -58.54, mean SC = 0.428. Both BIC and mean SC suggest that  $k = 2$  is the optimal number of clusters. Therefore,  $k = 2$  was used in the study.

## **Meta-analysis of the neuroimaging literature**

In the broad neuroimaging literature, we found 64 fMRI studies with full brain contrasts between face expressions (See Table S1). Among the 64 studies, 24 studies report at least one significant focus of fusiform sensitivity to differences in expressions (See Figure S5 for activation map). A total of 999 significant foci were reported in those experiments for contrasts between different facial expressions (Figure S5). A full brain activation likelihood estimation (ALE) was performed and significance was assessed using a cluster-based permutation test. 4 significant clusters were found at the  $p < 0.01$  threshold, none of which included the fusiform. The MNI coordinates for the center and the corresponding label names of the 4 clusters are shown in Table S2.

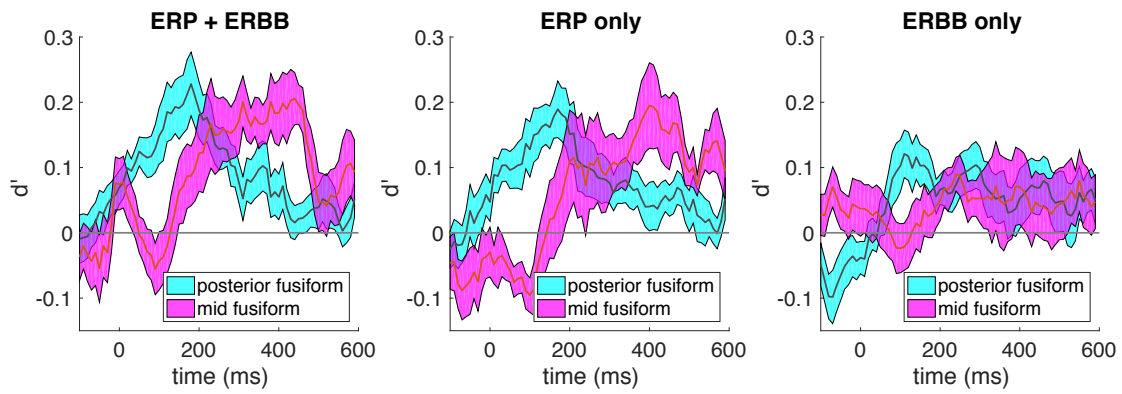

**Figure S1.** The mean and standard error for pairwise classification between different face expressions in posterior fusiform electrodes and mid-fusiform electrodes, using both ERP and ERBB features (left), using only ERP features (middle), and using only ERBB features (right).

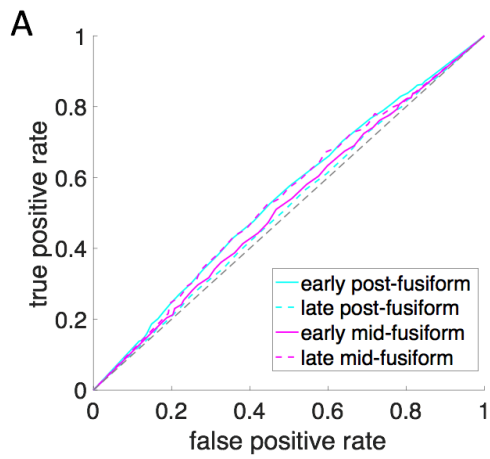

**B**

| AUC<br>(mean $\pm$ s.e.) | Early<br>(150 – 200 ms) | Late<br>(400-450 ms) |
|--------------------------|-------------------------|----------------------|
| <b>Post-fusiform</b>     | 0.54 $\pm$ 0.008        | 0.51 $\pm$ 0.005     |
| <b>Mid-fusiform</b>      | 0.52 $\pm$ 0.008        | 0.54 $\pm$ 0.009     |

**Figure S2.** The mean ROC curve and area-under-curve (AUC) for posterior fusiform electrodes and mid-fusiform electrodes at early (150-200 ms after stim onset) and late stage (400-450 ms after stim onset).

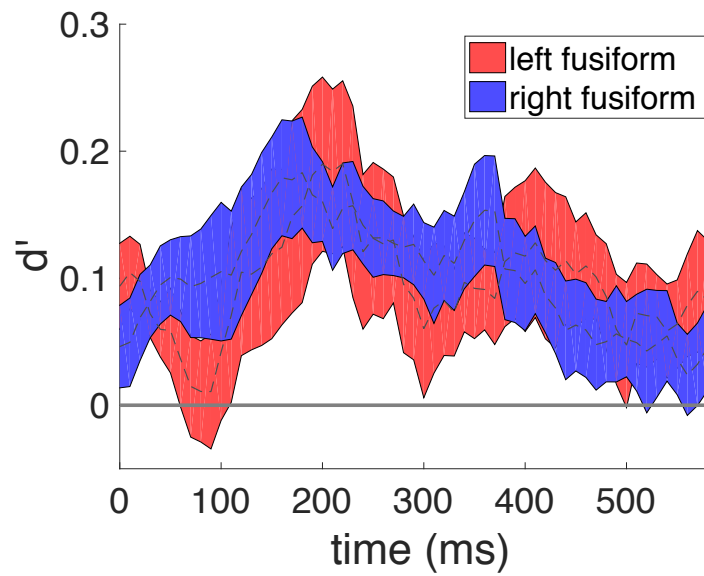

**Figure S3. The mean and standard error for classification between different face expressions in left and right fusiform electrodes.** The timecourse of the left fusiform peaked at 220 ms after stimulus onset with mean  $d' = 0.19$ , and the timecourse of the right fusiform peaked at 180 ms after stimulus onset with mean  $d' = 0.18$  (both  $p < 0.05$ , binomial test, Bonferroni corrected).

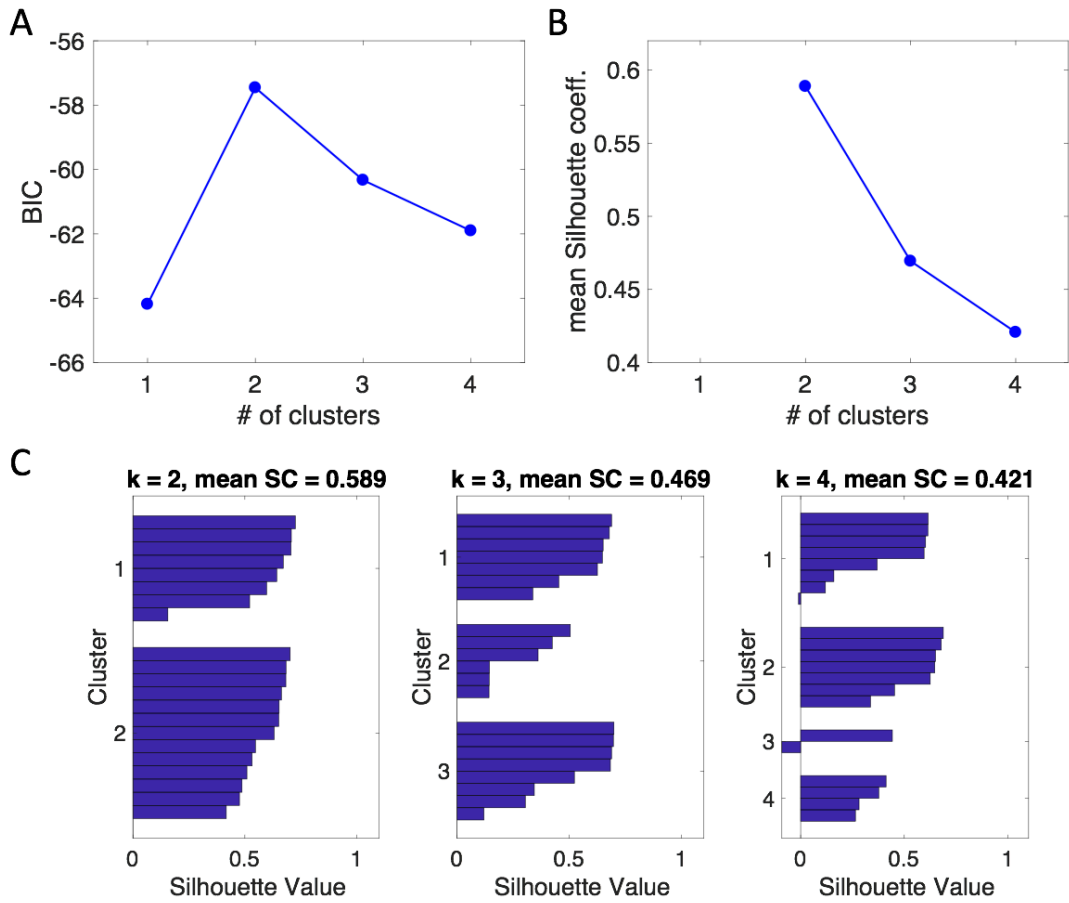

**Figure S4. Clustering analysis.** **A)** BIC of  $k$ -means models with different values of  $k$  ( $k = 1, 2, 3, 4$ ). **B)** Mean SC of  $k$ -means models with different values of  $k$  ( $k = 2, 3, 4$ , note that SC is not applicable for  $k = 1$ ). **C)** The distribution of Silhouette Coefficients (SC) with different values of  $k$  in  $k$ -means clustering. From left to right,  $k = 2, 3$ , and 4.



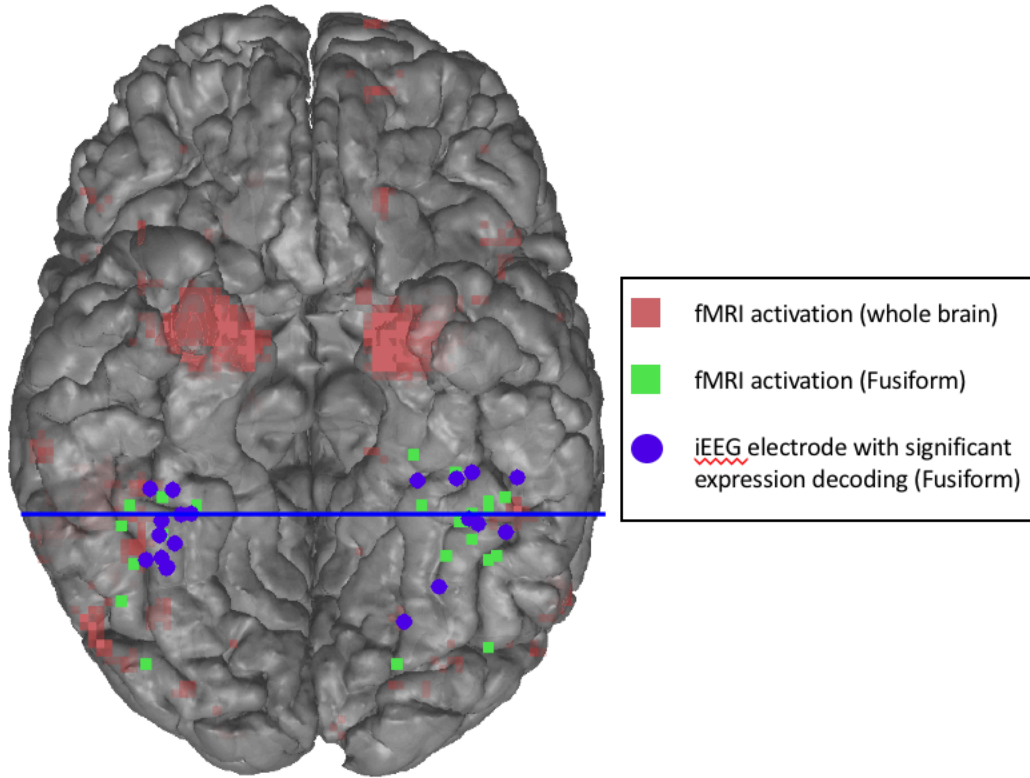

**Figure S5. Activation map for facial expressions.** (Red) Whole brain activation map from all 64 relevant fMRI studies. (Green square) Voxels in fusiform reported in 24/64 of the fMRI studies that have significant contrast between facial expressions. (Blue dots) iEEG electrodes in fusiform that have significant facial expression decoding. (Blue line) the border between posterior and mid-fusiform clusters based upon clustering analysis in the iEEG electrodes.

**Table S1** A summary list for the 64 neuroimaging studies included in the meta-analysis (the 24 studies that report significant emotional sensitivity in fusiform are marked in bold font).

|          | title                                                                                                                     | authors                                                                                             | journal                                     | year        |
|----------|---------------------------------------------------------------------------------------------------------------------------|-----------------------------------------------------------------------------------------------------|---------------------------------------------|-------------|
| <b>1</b> | <b>A common neural code for perceived and inferred emotion.</b>                                                           | <b>Skerry AE, Saxe R</b>                                                                            | <b>Journal of neuroscience</b>              | <b>2014</b> |
| 2        | A left amygdala mediated network for rapid orienting to masked fearful faces.                                             | Carlson JM, Reinke KS, Habib R                                                                      | Neuropsychologia                            | 2009        |
| 3        | A neural network reflecting individual differences in cognitive processing of emotions during perceptual decision making. | Meriau K, Wartenburger I, Kazzer P, Prehn K, Lammers CH, van der Meer E, Villringer A, Heekeren HR  | NeuroImage                                  | 2006        |
| 4        | Affect-specific activation of shared networks for perception and execution of facial expressions.                         | Kircher T, Pohl A, Krach S, Thimm M, Schulte-Ruther M, Anders S, Mathiak K                          | Social cognitive and affective neuroscience | 2013        |
| 5        | Amygdala activation at 3T in response to human and avatar facial expressions of emotions.                                 | Moser E, Derntl B, Robinson S, Fink B, Gur RC, Grammer K                                            | Journal of neuroscience methods             | 2007        |
| 6        | Amygdala integrates emotional expression and gaze direction in response to dynamic facial expressions.                    | Sato W, Kochiyama T, Uono S, Yoshikawa S                                                            | NeuroImage                                  | 2010        |
| 7        | Amygdala reactivity predicts automatic negative evaluations for facial emotions.                                          | Dannlowski U, Ohrmann P, Bauer J, Kugel H, Arolt V, Heindel W, Suslow T                             | Psychiatry research                         | 2007        |
| 8        | Amygdala response to facial expressions in children and adults.                                                           | Thomas KM, Drevets WC, Whalen PJ, Eccard CH, Dahl RE, Ryan ND, Casey BJ                             | Biological psychiatry                       | 2001        |
| 9        | Amygdala response to facial expressions reflects emotional learning.                                                      | Hooker CI, Germine LT, Knight RT, D'Esposito M                                                      | Journal of neuroscience                     | 2006        |
| 10       | Anxiety predicts a differential neural response to attended and unattended facial signals of anger and fear.              | Ewbank MP, Lawrence AD, Passamonti L, Keane J, Peers PV, Calder AJ                                  | NeuroImage                                  | 2009        |
| 11       | Automatic emotion processing as a function of trait emotional awareness: an fMRI study.                                   | Lichev V, Sacher J, Ihme K, Rosenberg N, Quirin M, Lepsien J, Pampel A, Rufer M, Grabe HJ, Kugel H, | Social cognitive and affective neuroscience | 2014        |

|           |                                                                                                                     |                                                                                                          |                                   |             |
|-----------|---------------------------------------------------------------------------------------------------------------------|----------------------------------------------------------------------------------------------------------|-----------------------------------|-------------|
|           |                                                                                                                     | Kersting A, Villringer A, Lane RD, Suslow T                                                              |                                   |             |
| 12        | Beyond threat: amygdala reactivity across multiple expressions of facial affect.                                    | Fitzgerald DA, Angstadt M, Jelsone LM, Nathan PJ, Phan KL                                                | NeuroImage                        | 2006        |
| <b>13</b> | <b>Binding action and emotion in social understanding.</b>                                                          | <b>Ferri F, Ebisch SJ, Costantini M, Salone A, Arciero G, Mazzola V, Ferro FM, Romani GL, Gallese V</b>  | <b>PloS one</b>                   | <b>2013</b> |
| <b>14</b> | <b>Both of us disgusted in My insula: the common neural basis of seeing and feeling disgust.</b>                    | <b>Wicker B, Keysers C, Plailly J, Royet JP, Gallese V, Rizzolatti G</b>                                 | <b>Neuron</b>                     | <b>2003</b> |
| 15        | Brain networks involved in haptic and visual identification of facial expressions of emotion: an fMRI study.        | Kitada R, Johnsrude IS, Kochiyama T, Lederman SJ                                                         | NeuroImage                        | 2010        |
| <b>16</b> | <b>Brain responses to dynamic facial expressions of pain.</b>                                                       | <b>Simon D, Craig KD, Miltner WH, Rainville P</b>                                                        | <b>Pain</b>                       | <b>2006</b> |
| 17        | Brain responses to facial expressions of pain: emotional or motor mirroring?                                        | Budell L, Jackson P, Rainville P                                                                         | NeuroImage                        | 2010        |
| <b>18</b> | <b>Cerebral integration of verbal and nonverbal emotional cues: impact of individual nonverbal dominance.</b>       | <b>Jacob H, Kreifelts B, Bruck C, Erb M, Hosl F, Wildgruber D</b>                                        | <b>NeuroImage</b>                 | <b>2012</b> |
| 19        | Cerebral regulation of facial expressions of pain.                                                                  | Kunz M, Chen JI, Lautenbacher S, Vachon-Preseu E, Rainville P                                            | Journal of neuroscience           | 2011        |
| 20        | Classification images reveal the information sensitivity of brain voxels in fMRI.                                   | Smith FW, Muckli L, Brennan D, Pernet C, Smith ML, Belin P, Gosselin F, Hadley DM, Cavanagh J, Schyns PG | NeuroImage                        | 2008        |
| 21        | Converging evidence for the advantage of dynamic facial expressions.                                                | Arsalidou M, Morris D, Taylor MJ                                                                         | Brain topography                  | 2011        |
| <b>22</b> | <b>Decoding of affective facial expressions in the context of emotional situations.</b>                             | <b>Sommer M, Dohnel K, Meinhardt J, Hajak G</b>                                                          | <b>Neuropsychologia</b>           | <b>2008</b> |
| 23        | Dynamic facial expressions evoke distinct activation in the face perception network: a connectivity analysis study. | Foley E, Rippon G, Thai NJ, Longe O, Senior C                                                            | Journal of cognitive neuroscience | 2012        |

|    |                                                                                                                                                        |                                                                                                   |                            |             |
|----|--------------------------------------------------------------------------------------------------------------------------------------------------------|---------------------------------------------------------------------------------------------------|----------------------------|-------------|
| 24 | <b>Dynamic stimuli demonstrate a categorical representation of facial expression in the amygdala.</b>                                                  | <b>Harris RJ, Young AW, Andrews TJ</b>                                                            | <b>Neuropsychologia</b>    | <b>2014</b> |
| 25 | <b>Emotions in motion: dynamic compared to static facial expressions of disgust and happiness reveal more widespread emotion-specific activations.</b> | <b>Trautmann SA, Fehr T, Herrmann M</b>                                                           | <b>Brain research</b>      | <b>2009</b> |
| 26 | Enhanced neural activity in response to dynamic facial expressions of emotion: an fMRI study.                                                          | Sato W, Kochiyama T, Yoshikawa S, Naito E, Matsumura M                                            | Cognitive brain research   | 2004        |
| 27 | <b>Facial emotion modulates the neural mechanisms responsible for short interval time perception.</b>                                                  | <b>Tipples J, Brattan V, Johnston P</b>                                                           | <b>Brain topography</b>    | <b>2015</b> |
| 28 | <b>Facial expression and gaze-direction in human superior temporal sulcus.</b>                                                                         | <b>Engell AD, Haxby JV</b>                                                                        | <b>Neuropsychologia</b>    | <b>2007</b> |
| 29 | Facial expressions and complex IAPS pictures: common and differential networks.                                                                        | Britton JC, Taylor SF, Sudheimer KD, Liberzon I                                                   | NeuroImage                 | 2006        |
| 30 | Frontal lobe networks for effective processing of ambiguously expressed emotions in humans.                                                            | Nomura M, Iidaka T, Kakehi K, Tsukiura T, Hasegawa T, Maeda Y, Matsue Y                           | Neuroscience letters       | 2003        |
| 31 | Functional imaging of face and hand imitation: towards a motor theory of empathy.                                                                      | Leslie KR, Johnson-Frey SH, Grafton ST                                                            | NeuroImage                 | 2004        |
| 32 | <b>Functional neuroanatomy of perceiving surprised faces.</b>                                                                                          | <b>Schroeder U, Hennenlotter A, Erhard P, Haslinger B, Stahl R, Lange KW, Ceballos-Baumann AO</b> | <b>Human brain mapping</b> | <b>2004</b> |
| 33 | Functional responses and structural connections of cortical areas for processing faces and voices in the superior temporal sulcus.                     | Ethofer T, Bretscher J, Wiethoff S, Bisch J, Schlipf S, Wildgruber D, Kreifelts B                 | NeuroImage                 | 2013        |
| 34 | Incongruence effects in crossmodal emotional integration.                                                                                              | Muller VI, Habel U, Derntl B, Schneider F, Zilles K, Turetsky BI, Eickhoff SB                     | NeuroImage                 | 2011        |

|    |                                                                                                                          |                                                                                                  |                                                    |             |
|----|--------------------------------------------------------------------------------------------------------------------------|--------------------------------------------------------------------------------------------------|----------------------------------------------------|-------------|
| 35 | <b>Integration of cross-modal emotional information in the human brain: an fMRI study.</b>                               | <b>Park JY, Gu BM, Kang DH, Shin YW, Choi CH, Lee JM, Kwon JS</b>                                | <b>Cortex</b>                                      | <b>2010</b> |
| 36 | <b>Investigating the brain basis of facial expression perception using multi-voxel pattern analysis.</b>                 | <b>Wegrzyn M, Riehle M, Labudda K, Woermann F, Baumgartner F, Pollmann S, Bien CG, Kissler J</b> | <b>Cortex</b>                                      | <b>2015</b> |
| 37 | Is a neutral expression also a neutral stimulus? A study with functional magnetic resonance.                             | Carvajal F, Rubio S, Serrano JM, Rios-Lago M, Alvarez-Linera J, Pacheco L, Martin P              | Experimental brain research                        | 2013        |
| 38 | <b>Leaving a bad taste in your mouth but not in my insula.</b>                                                           | <b>von dem Hagen EA, Beaver JD, Ewbank MP, Keane J, Passamonti L, Lawrence AD, Calder AJ</b>     | <b>Social cognitive and affective neuroscience</b> | <b>2009</b> |
| 39 | Masked presentations of emotional facial expressions modulate amygdala activity without explicit knowledge.              | Whalen PJ, Rauch SL, Etcoff NL, McInerney SC, Lee MB, Jenike MA                                  | Journal of neuroscience                            | 1998        |
| 40 | Mind your left: spatial bias in subcortical fear processing.                                                             | Siman-Tov T, Papo D, Gadoth N, Schonberg T, Mendelsohn A, Perry D, Hendler T                     | Journal of cognitive neuroscience                  | 2009        |
| 41 | <b>Multiple mechanisms of consciousness: the neural correlates of emotional awareness.</b>                               | <b>Amtong JM, Greening SG, Mitchell DG</b>                                                       | <b>Journal of neuroscience</b>                     | <b>2010</b> |
| 42 | Neural mechanism for judging the appropriateness of facial affect.                                                       | Kim JW, Kim JJ, Jeong BS, Ki SW, Im DM, Lee SJ, Lee HS                                           | Cognitive brain research                           | 2005        |
| 43 | <b>Neural mechanism of unconscious perception of surprised facial expression.</b>                                        | <b>Duan X, Dai Q, Gong Q, Chen H</b>                                                             | <b>NeuroImage</b>                                  | <b>2010</b> |
| 44 | Neural responses to ambiguity involve domain-general and domain-specific emotion processing systems.                     | Neta M, Kelley WM, Whalen PJ                                                                     | Journal of cognitive neuroscience                  | 2013        |
| 45 | <b>Nonconscious emotional processing involves distinct neural pathways for pictures and videos.</b>                      | <b>Faivre N, Charron S, Roux P, Lehericy S, Kouider S</b>                                        | <b>Neuropsychologia</b>                            | <b>2012</b> |
| 46 | <b>Orbitofrontal and hippocampal contributions to memory for face-name associations: the rewarding power of a smile.</b> | <b>Tsukiura T, Cabeza R</b>                                                                      | <b>Neuropsychologia</b>                            | <b>2008</b> |

|           |                                                                                                                                                            |                                                                                                                                                    |                                                    |             |
|-----------|------------------------------------------------------------------------------------------------------------------------------------------------------------|----------------------------------------------------------------------------------------------------------------------------------------------------|----------------------------------------------------|-------------|
| 47        | Orbitofrontal Cortex Reactivity to Angry Facial Expression in a Social Interaction Correlates with Aggressive Behavior.                                    | Beyer F, Munte TF, Gottlich M, Kramer UM                                                                                                           | Cerebral cortex                                    | 2014        |
| 48        | Positive facial affect - an fMRI study on the involvement of insula and amygdala.                                                                          | Pohl A, Anders S, Schulte-Ruther M, Mathiak K, Kircher T                                                                                           | PloS one                                           | 2013        |
| 49        | Preferential amygdala reactivity to the negative assessment of neutral faces.                                                                              | Blasi G, Hariri AR, Alce G, Taurisano P, Sambataro F, Das S, Bertolino A, Weinberger DR, Mattay VS                                                 | Biological psychiatry                              | 2009        |
| 50        | Pupillary contagion: central mechanisms engaged in sadness processing.                                                                                     | Harrison NA, Singer T, Rotshtein P, Dolan RJ, Critchley HD                                                                                         | Social cognitive and affective neuroscience        | 2006        |
| <b>51</b> | <b>Reduced emotion processing efficiency in healthy males relative to females.</b>                                                                         | <b>Weisenbach SL, Rapport LJ, Briceno EM, Haase BD, Vederman AC, Bieliauskas LA, Welsh RC, Starkman MN, McInnis MG, Zubieta JK, Langenecker SA</b> | <b>Social cognitive and affective neuroscience</b> | <b>2014</b> |
| <b>52</b> | <b>Segregating intra-amygdalar responses to dynamic facial emotion with cytoarchitectonic maximum probability maps.</b>                                    | <b>Hurlemann R, Rehme AK, Diessel M, Kukulja J, Maier W, Walter H, Cohen MX</b>                                                                    | <b>Journal of neuroscience methods</b>             | <b>2008</b> |
| 53        | Similarities and differences in perceiving threat from dynamic faces and bodies. An fMRI study.                                                            | Kret ME, Pichon S, Grezes J, de Gelder B                                                                                                           | NeuroImage                                         | 2011        |
| 54        | Stop looking angry and smile, please: start and stop of the very same facial expression differentially activate threat- and reward-related brain networks. | Muhlberger A, Wieser MJ, Gerdes AB, Frey MC, Weyers P, Pauli P                                                                                     | Social cognitive and affective neuroscience        | 2011        |
| 55        | Temporal pole activity during perception of sad faces, but not happy faces, correlates with neuroticism trait.                                             | Jimura K, Konishi S, Miyashita Y                                                                                                                   | Neuroscience letters                               | 2009        |
| <b>56</b> | <b>The amygdala and FFA track both social and non-social face dimensions.</b>                                                                              | <b>Said CP, Dotsch R, Todorov A</b>                                                                                                                | <b>Neuropsychologia</b>                            | <b>2010</b> |
| 57        | The amygdala processes the emotional significance of facial expressions: an fMRI investigation using the                                                   | Sato W, Yoshikawa S, Kochiyama T, Matsumura M                                                                                                      | NeuroImage                                         | 2004        |

|           |                                                                                                                           |                                                                                                                                 |                                                    |             |
|-----------|---------------------------------------------------------------------------------------------------------------------------|---------------------------------------------------------------------------------------------------------------------------------|----------------------------------------------------|-------------|
|           | interaction between expression and face direction.                                                                        |                                                                                                                                 |                                                    |             |
| 58        | The behavioral and neural effect of emotional primes on intertemporal decisions.                                          | Luo S, Ainslie G, Monterosso J                                                                                                  | Social cognitive and affective neuroscience        | 2014        |
| <b>59</b> | <b>The changing face of emotion: age-related patterns of amygdala activation to salient faces.</b>                        | <b>Todd RM, Evans JW, Morris D, Lewis MD, Taylor MJ</b>                                                                         | <b>Social cognitive and affective neuroscience</b> | <b>2011</b> |
| <b>60</b> | <b>The functional correlates of face perception and recognition of emotional facial expressions as evidenced by fMRI.</b> | <b>Jehna M, Neuper C, Ischebeck A, Loitfelder M, Ropele S, Langkammer C, Ebner F, Fuchs S, Schmidt R, Fazekas F, Enzinger C</b> | <b>Brain research</b>                              | <b>2011</b> |
| 61        | The highly sensitive brain: an fMRI study of sensory processing sensitivity and response to others' emotions.             | Acevedo BP, Aron EN, Aron A, Sangster MD, Collins N, Brown LL                                                                   | Brain and behavior                                 | 2014        |
| 62        | The Kuleshov Effect: the influence of contextual framing on emotional attributions.                                       | Mobbs D, Weiskopf N, Lau HC, Featherstone E, Dolan RJ, Frith CD                                                                 | Social cognitive and affective neuroscience        | 2006        |
| 63        | The stimuli drive the response: an fMRI study of youth processing adult or child emotional face stimuli.                  | Marusak HA, Carre JM, Thomason ME                                                                                               | NeuroImage                                         | 2013        |
| <b>64</b> | <b>Viewing facial expressions of pain engages cortical areas involved in the direct experience of pain.</b>               | <b>Botvinick M, Jha AP, Bylsma LM, Fabian SA, Solomon PE, Prkachin KM</b>                                                       | <b>NeuroImage</b>                                  | <b>2005</b> |

**Table S2** the MNI coordinates for the weighted center, volume, and the corresponding label name of the significant clusters in the ALE map from meta-analysis

| Cluster # | X   | Y   | Z   | Volume (mm <sup>3</sup> ) | Lateralization | Label                          |
|-----------|-----|-----|-----|---------------------------|----------------|--------------------------------|
| 1         | 23  | -3  | -18 | 6088                      | right          | amygdala                       |
| 2         | -22 | -4  | -18 | 4640                      | left           | amygdala                       |
| 3         | 56  | -42 | 5   | 2520                      | right          | middle/superior temporal gyrus |
| 4         | 3   | 11  | 53  | 1464                      | right          | superior frontal gyrus         |



**Table S3** 17 features used for the facial feature space

| Feature # | Feature name                               |
|-----------|--------------------------------------------|
| 1         | eyebrow length                             |
| 2         | inter-eyebrow distance                     |
| 3         | eye width                                  |
| 4         | inter-eyes distance                        |
| 5         | vertical distance between eyes and nosetip |
| 6         | horizontal length of the nose              |
| 7         | distance between nose and upper lip        |
| 8         | face height                                |
| 9         | face width                                 |
| 10        | eye height                                 |
| 11        | width of the mouth                         |
| 12        | intense of red on cheeks                   |
| 13        | intense of green on cheeks                 |
| 14        | intense of blue on cheeks                  |
| 15        | contrast polarity between eyes and nose    |
| 16        | eye area                                   |
| 17        | eye mouth ratio                            |

## Reference:

- Eickhoff SB, Bzdok D, Laird AR, Kurth F, Fox PT. 2012. Activation likelihood estimation meta-analysis revisited. *Neuroimage* 59:2349-2361.
- Eickhoff SB, Laird AR, Grefkes C, Wang LE, Zilles K, Fox PT. 2009. Coordinate-based activation likelihood estimation meta-analysis of neuroimaging data: a random-effects approach based on empirical estimates of spatial uncertainty. *Hum Brain Mapp* 30:2907-2926.
- Furl N, Lohse M, Pizzorni-Ferrarese F. 2017. Low-frequency oscillations employ a general coding of the spatio-temporal similarity of dynamic faces. *Neuroimage* 157:486-499.
- Kass RE, Wasserman L. 1995. A Reference Bayesian Test for Nested Hypotheses and Its Relationship to the Schwarz Criterion. *J Am Stat Assoc* 90:928-934.
- Kaufman L, Rousseeuw PJ. 2009. *Finding groups in data: an introduction to cluster analysis*. Hoboken, NJ: John Wiley & Sons.
- Laird AR, Fox PM, Price CJ, Glahn DC, Uecker AM, Lancaster JL, Turkeltaub PE, Kochunov P, Fox PT. 2005. ALE meta-analysis: controlling the false discovery rate and performing statistical contrasts. *Hum Brain Mapp* 25:155-164.
- Pelleg D, Moore AW. 2000. X-means: Extending k-means with efficient estimation of the number of clusters. *International Conference on Machine Learning* 1:727-734.
- Turkeltaub PE, Eickhoff SB, Laird AR, Fox M, Wiener M, Fox P. 2012. Minimizing within-experiment and within-group effects in Activation Likelihood Estimation meta-analyses. *Hum Brain Mapp* 33:1-13.
